# Supplementary material
Source: MDPI journal article supplement (https://www.mdpi.com/2504-477X/7/8/326)
Supplement: s1 [file s1]

Archive with 1 entries (1 files):
- jcs-2507908-supplementary.pdf
