# Supplementary material
Source: MDPI journal article supplement (https://www.mdpi.com/2504-477X/7/8/326)

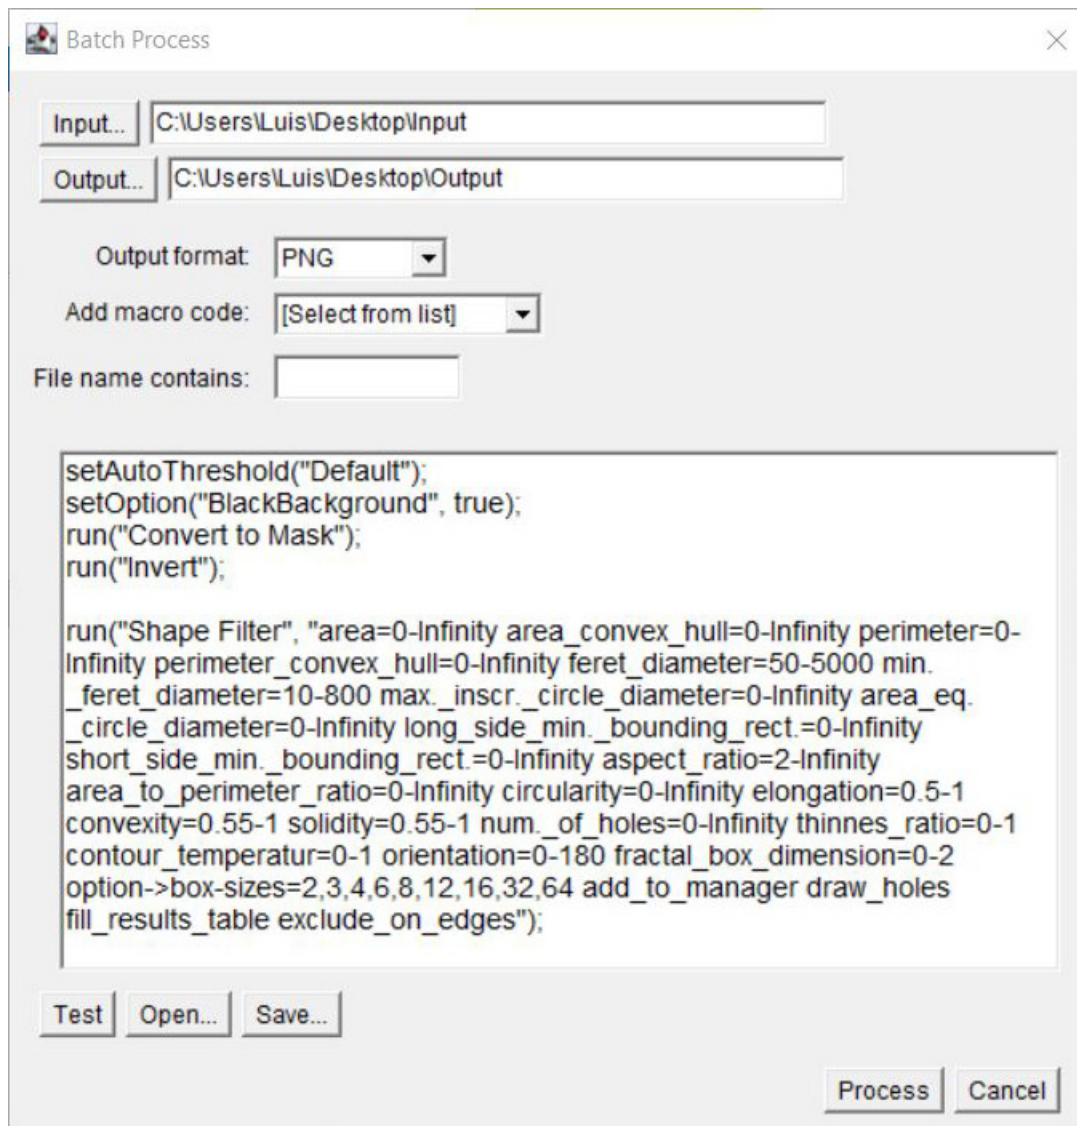

Figure S1. ImageJ macro for automated fiber recognition and measurement.

Supplement: s1 [file s1 › jcs-2507908-supplementary.pdf]
